# Supplementary material for: The differentiation state of the Schwann cell progenitor drives phenotypic variation between two contagious cancers
Source: PLoS Pathog. 2021 Nov 15;17(11):e1010033. doi: 10.1371/journal.ppat.1010033 (PMC8629380; doi:10.1371/journal.ppat.1010033)
Supplement: S9 Table — (XLSX) [file ppat.1010033.s012.xlsx]

## Sheet: Results 
Expression vs RPL13A	DFT1 control								DFT2 Control
Gene	Replicate 1		Replicate 2		Replicate 3		Average	SEM	Replicate 1		Replicate 2		Replicate 3		Average	SEM			DFT1 Biological replicates						DFT2 Biological replicates
MBP	2.82749	3.28641	2.78469	2.12093	1.28622	1.11761	2.23722	0.361497	0.0345583	0.0356214	0.0383284	0.0458352	0.0195072	0.0147872	0.0314396	0.00483593			Control			IFNg			Control			IFNg
MAG	2.28089	2.60561	2.15985	2.03035	1.48378	1.53268	2.01553	0.17847	0	0	0	0	0	0	0	0		Gene	1	2	3	1	2	3	1	2	3	1	2	3
MPZ	1.24398	1.29314	1.18719	1.16515	1.08218	1.06525	1.17282	0.0363276	0.000431095	0.000327165	0.00068272	0.00054027	0.000170734	0.000187839	0.00038997	8.22294e-05		MBP	3.05695	2.45281	1.20191	1.10018	0.882619	0.967459	0.0350899	0.0420818	0.0171472	0.0212672	0.019459	0.0126414
PLP1	1.31824	1.37546	1.50206	1.47159	1.14374	1.06317	1.31238	0.0720856	0.315653	0.276301	0.396993	0.445197	0.253041	0	0.281197	0.0636083		MAG	2.44325	2.0951	1.50823	3.25878	2.07839	1.41135	0	0	0	0	0	0
PRX	1.32735	1.28612	1.24871	1.27614	0.929338	1.09336	1.1935	0.0622312	0	0	0	0	0	0	0	0		MPZ	1.26856	1.17617	1.07372	0.108808	0.555361	1.0213	0.00037913	0.000611495	0.000179286	0.000800984	0.000338174	0.000444405
PMP22	1.08037	1.08957	1.37186	1.2951	0.903392	0.932605	1.11215	0.0770839	0.0434592	0.0511465	0.050188	0.0517636	0.0486536	0.0526759	0.0496478	0.00135979		PLP1	1.34685	1.48683	1.10345	0.494556	0.543014	0.766808	0.295977	0.421095	0.12652	0.434805	0.309101	0.374831
L1CAM	0.094781	0.0465428	0.148039	0.0888466	0.102832	0.116828	0.0996449	0.0136717	2.90089	2.37977	2.24352	2.32842	1.31296	1.22835	2.06565	0.268614		PRX	1.30674	1.26242	1.01135	0.213676	0.677152	0.934718	0	0	0	0.006734	0.00464989	0
PDGFRA	0	0	0	0	0	0	0	0	1.00557	0.92966	1.25075	1.43328	1.17654	1.13884	1.15577	0.0731296		PMP22	1.08497	1.33348	0.917998	0.902527	0.623958	0.581318	0.0473029	0.0509758	0.0506648	0.0415924	0.0355479	0.0293148
NGFR	1.21592	1.16671	1.10748	1.16523	1.4871	1.55688	1.28322	0.0773228	0.319286	0.3051	0.568265	0.558073	0.475832	0.496187	0.453791	0.0470683		L1CAM	0.0706619	0.118443	0.10983	0.231159	0.213625	0.159116	2.64033	2.28597	1.27066	2.249	0.626633	1.32098
FABP7	0	0	0	0	0	0	0	0	0	0	0	0	0	0	0	0		PDGFRA	0	0	0	0	0	0	0.967614	1.34202	1.15769	1.10227	0.821047	0.979293
																		NGFR	1.19132	1.13636	1.52199	0.148515	0.901	1.59938	0.312193	0.563169	0.48601	0.584818	0.383773	0.537005
																		FABP7	0	0	0	0	0	0	0	0	0	0	0	0
Expression vs RPL13A	DFT1 IFNg								DFT2 IFNg
Gene	Replicate 1		Replicate 2		Replicate 3		Average	SEM	Replicate 1		Replicate 2		Replicate 3		Average	SEM
MBP	1.07038	1.12998	0.737184	1.02805	0.767612	1.16731	0.98342	0.0757306	0.0257215	0.0168129	0.0151355	0.0237825	0.0174573	0.00782551	0.0177892	0.00262184			DFT1 Average				DFT2 Average
MAG	3.34703	3.17053	2.13468	2.02211	1.42679	1.39592	2.24951	0.342696	0	0	0	0	0	0	0	0		Gene	Control	SEM	IFNg	SEM	Control	SEM	IFNg	SEM
MPZ	0.112988	0.104628	0.539576	0.571145	1.05507	0.987539	0.561824	0.166892	0.000887009	0.000714959	0.000295834	0.000380514	0.000312084	0.000576726	0.000527854	9.80625e-05		MBP	2.23722	0.546245	0.98342	0.0633097	0.0314396	0.00742578	0.0177892	0.00262628
PLP1	0.594746	0.394367	0.548415	0.537614	0.777463	0.756153	0.601459	0.0590845	0.461975	0.407636	0.271364	0.346837	0.395337	0.354325	0.372912	0.0264438		MAG	2.01553	0.272832	2.24951	0.540125	0	0	0	0
PRX	0.224732	0.202619	0.668849	0.685454	0.888551	0.980884	0.608515	0.134	0.00647202	0.00699598	0.00380989	0.00548989	0	0	0.00379463	0.00127919		MPZ	1.17282	0.0562705	0.561824	0.263435	0.00038997	0.000124886	0.000527854	0.000139966
PMP22	0.949969	0.855086	0.611999	0.635918	0.588462	0.574174	0.702601	0.0649664	0.0435735	0.0396113	0.036981	0.0341149	0.0299434	0.0286862	0.035485	0.00233451		PLP1	1.31238	0.112006	0.601459	0.0838492	0.281197	0.0853568	0.372912	0.0363005
L1CAM	0.187328	0.274991	0.208841	0.218409	0.1628	0.155433	0.210474	0.0171228	2.41449	2.08351	0.622595	0.630671	1.33999	1.30197	1.39887	0.300322		PRX	1.1935	0.0919712	0.608515	0.210957	0	0	0.00379463	0.00199042
PDGFRA	0	0	0	0	0	0	0	0	1.10458	1.09996	0.887051	0.755044	0.983773	0.974813	0.967536	0.0542413		PMP22	1.11215	0.120707	0.702601	0.100718	0.0496478	0.0011759	0.035485	0.00354438
NGFR	0.143753	0.153278	0.843815	0.958185	1.55251	1.64625	0.882966	0.265642	0.592973	0.576664	0.384482	0.383065	0.545886	0.528123	0.501865	0.0384773		L1CAM	0.0996449	0.0147032	0.2013	0.0216908	2.06565	0.41045	1.39887	0.469953
FABP7	0	0	0	0	0	0	0	0	0	0	0	0	0	0	0	0		PDGFRA	0	0	0	0	1.15577	0.108084	0.967536	0.081394
																		NGFR	1.28322	0.120434	0.882966	0.418926	0.453791	0.0742198	0.501865	0.0606378
	DFT1			DFT2			Two way ANOVA p-values											FABP7	0	0	0	0	0	0	0	0
Gene	Control	IFNg	P-value	Control	IFNg	P-value	Treatment	Cell line	Interaction
MBP	2.23722	0.98342	0.0741236	0.0314396	0.0177892	0.0790585	0.0519222	0.000417981	0.0560954
MAG	2.01553	2.24951	0.359345	0	0	N/A	0.709083	0.000107359	0.709083
MPZ	1.17282	0.561824	0.14683	0.00038997	0.000527854	0.251536	0.0530847	0.00020127	0.053
PLP1	1.31238	0.601459	0.00353764	0.281197	0.372912	0.189371	0.00614221	6.89963e-05	0.00138827
PRX	1.1935	0.608515	0.0319245	0	0.00379463	0.064637	0.0355111	5.17282e-05	0.0337342
PMP22	1.11215	0.702601	0.0298622	0.0496478	0.035485	0.00961314	0.027307	4.15167e-06	0.0361259
L1CAM	0.0996449	0.2013	0.00892585	2.06565	1.39887	0.172718	0.391946	0.00097016	0.253472
PDGFRA	0	0	N/A	1.15577	0.967536	0.118272	0.201628	2.71398e-07	0.201628
NGFR	1.28322	0.882966	0.205226	0.453791	0.501865	0.321147	0.452802	0.026562	0.344534
FABP7	0	0	N/A	0	0	N/A	N/A	N/A	N/A
			Gene	Treatment	Cell line	Interaction	Control P-values
			MBP	0.0519222	0.000417981	0.0560954	0.0280904
			MAG	0.709083	0.000107359	0.709083	0.000895105
			MPZ	0.0530847	0.00020127	0.053	1.56771e-05
			PLP1	0.00614221	6.89963e-05	0.00138827	0.000925378
			PRX	0.0355111	5.17282e-05	0.0337342	0.000101727
			PMP22	0.027307	4.15167e-06	0.0361259	0.000459556
			L1CAM	0.391946	0.00097016	0.253472	0.00436593
			PDGFRA	0.201628	2.71398e-07	0.201628	0.000181093
			NGFR	0.452802	0.026562	0.344534	0.00211233
			FABP7	N/A	N/A	N/A
